# Supplementary material for: Genes with Restricted Introgression in a Field Cricket (Gryllus firmus/Gryllus pennsylvanicus) Hybrid Zone Are Concentrated on the X Chromosome and a Single Autosome
Source: PubMed Central journal article supplement (PMC4632042; doi:10.1534/g3.115.021246), 2015-08-26
Supplement: supp_g3.115.021246_TableS2.pdf [file supp_g3.115.021246_TableS2.pdf]

**Table S2 Information about new microsatellite loci developed for this project.** Locus name, Genbank accession number, repeat motif, repeat number, product length (range) and primer sequence for forward and reverse primers.

| Locus Name | accession number | repeat motif | repeat number | product length (bp) | Primer sequence (5'-3')                                              |
|------------|------------------|--------------|---------------|---------------------|----------------------------------------------------------------------|
| G4         | KM203912         | TG           | 15            | 147-205             | F: GGCCATTGAATATTCTATAACCAG<br>R: AACAGCGTGAAGACTGTCTTATTT           |
| G25        | KM203913         | GAT          | 10            | 248-272             | F: TGCATCCCACCGGAATGAAAATC<br>R: CCGATAGCCGCGGCAGTAGTG               |
| G11        | KM203914         | CA           | 13            | 367-405             | F: CGGTATTGCCCAACTGCAGATTCC<br>R:<br>ATGGGTAGTAGTGTAGTGCATGTTAAAGTAA |
| G7         | KM203915         | TTC          | 13            | 122-162             | F: TTTTCAACAACACGCCGTCAGA<br>R: TCACATCTTTATGAAAACGGGGAAATAT         |
| G21        | KM203916         | CAA          | 14            | 236-245             | F: TGCCGGTAGCTATCAAACACAGG<br>R: TCAAACACGAGATACATCCAGAAAGT          |
